# Supplementary material for: Genetic Hemoglobin Disorders, Infection, and Deficiencies of Iron and Vitamin A Determine Anemia in Young Cambodian Children
Source: PubMed Central journal article supplement — J Nutr. 2012 Feb 29;142(4):781–7. doi: 10.3945/jn.111.148189 (PMC3301994; doi:10.3945/jn.111.148189), 2012-02-29
Supplement: supp_jn.111.148189_nut148189-SFig1_ST1.pdf [file supp_jn.111.148189_nut148189-SFig1_ST1.pdf]

**Supplemental FIGURE 1** – Chart showing recruitment, genetic screening, and analyses of data for participants

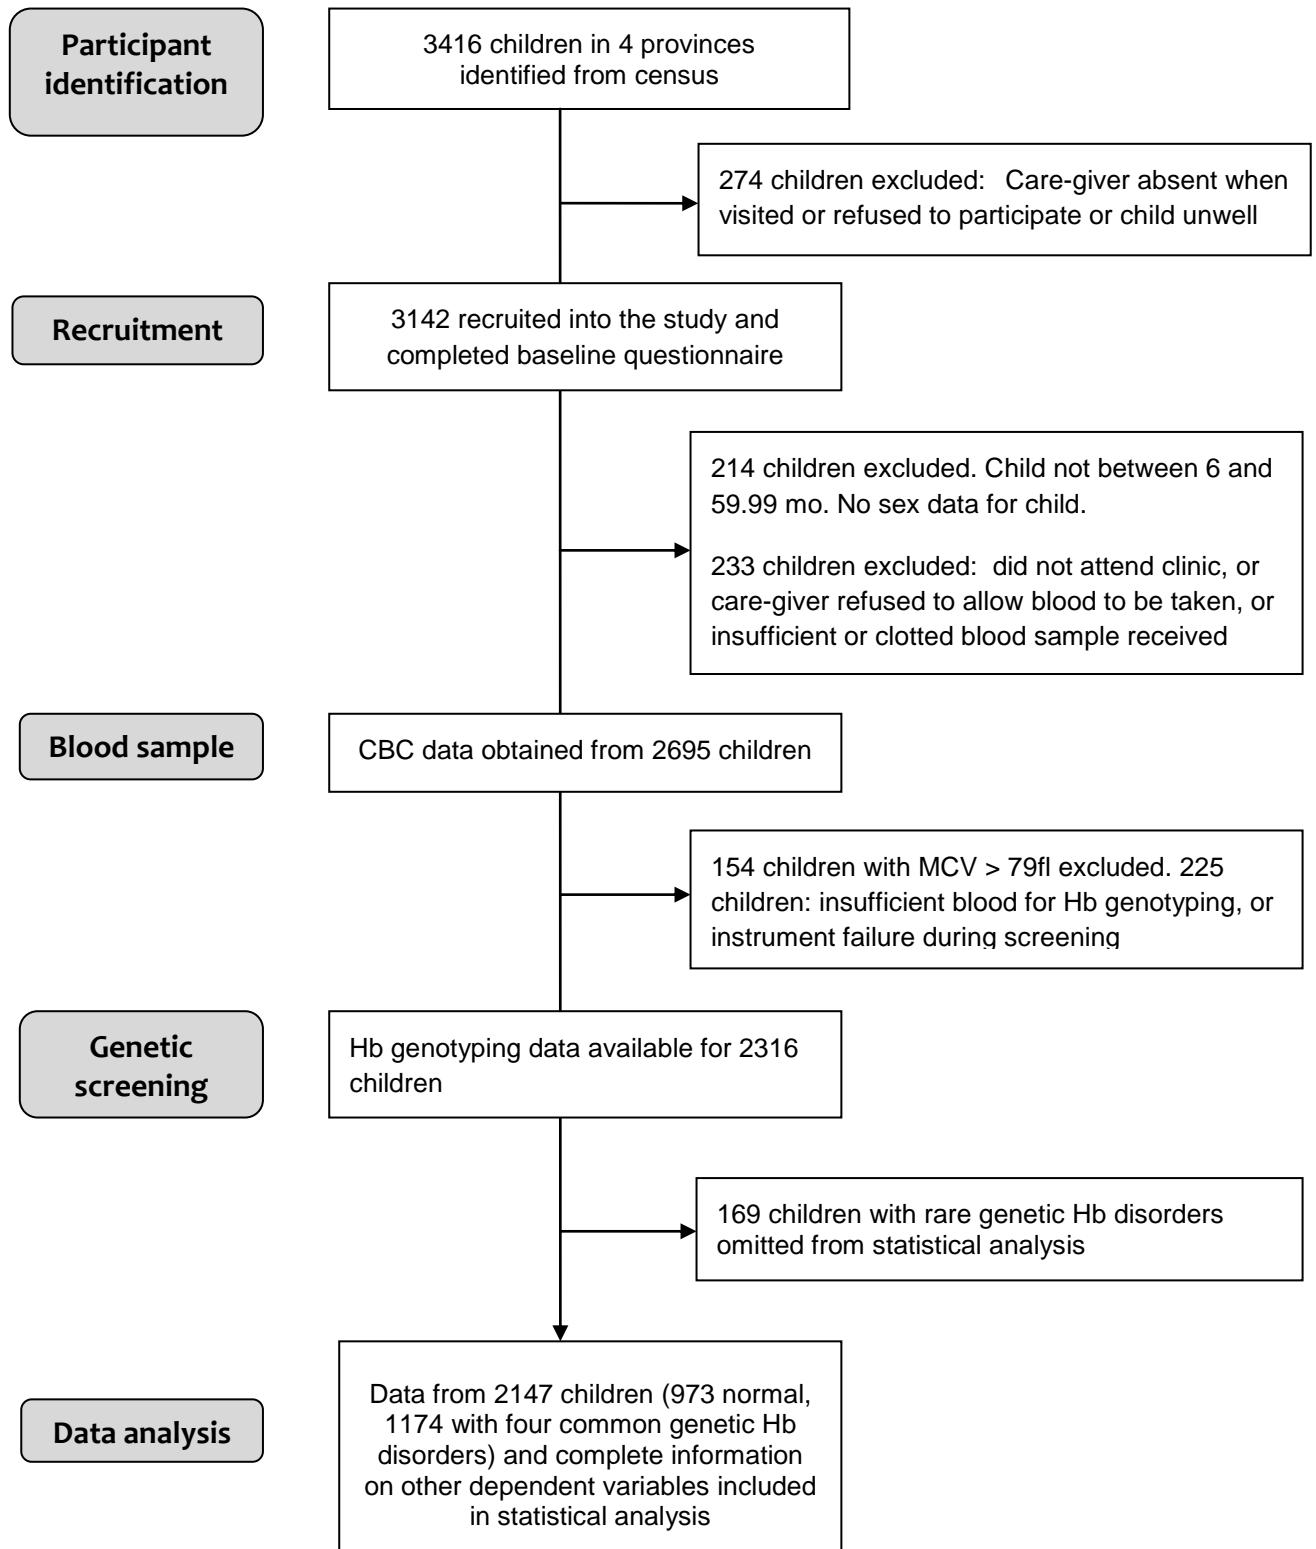

**Supplemental TABLE 1** Values for hematology, biomarkers of iron status, and retinol binding protein for children with normal Hb type (Hb AA) from three age-groups by rural and urban setting, and by sex<sup>1</sup>

|                                                                                                                    |          | Rural |                                | Urban |                   |       |                   |    |                    |
|--------------------------------------------------------------------------------------------------------------------|----------|-------|--------------------------------|-------|-------------------|-------|-------------------|----|--------------------|
|                                                                                                                    |          | Mo    | Boys                           | Girls | Boys              | Girls |                   |    |                    |
| Hb<br>g/L                                                                                                          | 6-11.99  | 46    | 96 ± 13                        | 49    | 102 ± 12          | 24    | 106 ± 13          | 17 | 104 ± 9            |
|                                                                                                                    | 12-23.99 | 99    | 103 ± 12                       | 90    | 104 ± 10          | 54    | 112 ± 11          | 63 | 112 ± 10           |
|                                                                                                                    | 24-59.99 | 193   | 112 ± 8                        | 154   | 113 ± 9           | 95    | 117 ± 8           | 89 | 116 ± 8            |
| * Age 6-11.99 mo : <i>P</i> <0.001; Age12-23.99 mo <i>P</i> <0.001; Setting : <i>P</i> <0.001; Sex <i>P</i> =0.027 |          |       |                                |       |                   |       |                   |    |                    |
| MCV<br>fL                                                                                                          | 6-11.99  | 46    | 67.3 ± 5.8                     | 49    | 70.0 ± 5.5        | 24    | 68.0 ± 5.9        | 17 | 70.6 ± 4.9         |
|                                                                                                                    | 12-23.99 | 99    | 68.7 ± 5.9                     | 90    | 70.6 ± 5.3        | 54    | 71.1 ± 4.5        | 63 | 72.4 ± 3.6         |
|                                                                                                                    | 24-59.99 | 193   | 74.1 ± 3.8                     | 154   | 74.7 ± 4.1        | 95    | 75.0 ± 3.3        | 89 | 75.8 ± 2.7         |
| * Age 6-11.99 mo : <i>P</i> <0.001; Age12-23.99 mo <i>P</i> =0.009; Setting : <i>P</i> <0.001; Sex <i>P</i> <0.001 |          |       |                                |       |                   |       |                   |    |                    |
| RBC<br>10 <sup>12</sup> /L                                                                                         | 6-11.99  | 46    | 4.61 ± 0.43                    | 49    | 4.61 ± 0.43       | 24    | 4.63 ± 0.42       | 17 | 4.42 ± 0.29        |
|                                                                                                                    | 12-23.99 | 99    | 4.83 ± 0.38                    | 90    | 4.70 ± 0.40       | 54    | 4.66 ± 0.39       | 63 | 4.55 ± 0.38        |
|                                                                                                                    | 24-59.99 | 193   | 4.60 ± 0.37                    | 154   | 4.58 ± 0.36       | 95    | 4.48 ± 0.34       | 89 | 4.54 ± 0.33        |
| * Age 6-11.99 mo : <i>P</i> =0.003; Age12-23.99 mo <i>P</i> =0.06; Setting : <i>P</i> <0.001; Sex <i>P</i> =0.05   |          |       |                                |       |                   |       |                   |    |                    |
| RDW<br>%                                                                                                           | 6-11.99  | 46    | 14.9 ± 2.6                     | 49    | 13.9 ± 2.3        | 21    | 15.9 ± 1.8        | 15 | 15.1 ± 1.2         |
|                                                                                                                    | 12-23.99 | 99    | 15.0 ± 2.4                     | 90    | 14.4 ± 2.2        | 48    | 15.3 ± 2.0        | 53 | 14.6 ± 1.5         |
|                                                                                                                    | 24-59.99 | 193   | 13.3 ± 1.2                     | 154   | 13.2 ± 1.2        | 90    | 13.7 ± 1.2        | 77 | 13.3 ± 0.9         |
| * Age 6-11.99 mo : <i>P</i> =0.79; Age12-23.99 mo <i>P</i> <0.001; Setting : <i>P</i> =0.004; Sex <i>P</i> <0.001  |          |       |                                |       |                   |       |                   |    |                    |
| Ferritin<br>µg/L                                                                                                   | 6-11.99  | 36    | 14.1 (4.6, 43.2) <sup>2</sup>  | 40    | 18.3 (7.0, 42.7)  | 23    | 17.5 (6.6, 46.4)  | 14 | 20.1 (7.4, 54.6)   |
|                                                                                                                    | 12-23.99 | 78    | 11.8 (5.2, 26.9)               | 70    | 13.6 (6.0, 30.8)  | 48    | 16.1 (6.7, 38.4)  | 56 | 21.0 (9.4, 46.9)   |
|                                                                                                                    | 24-59.99 | 167   | 26.6 (13.1, 54.0)              | 136   | 27.8 (13.0, 59.7) | 89    | 36.6 (18.5, 72.1) | 80 | 48.7 (24.0, 111.6) |
| * Age 6-11.99 mo : <i>P</i> =0.118; Age12-23.99 mo <i>P</i> <0.001; Setting : <i>P</i> <0.001; Sex <i>P</i> =0.001 |          |       |                                |       |                   |       |                   |    |                    |
| sTfr<br>mg/L                                                                                                       | 6-11.99  | 46    | 11.0 (7.7, 15.6)               | 49    | 9.0 (6.9, 11.8)   | 24    | 9.6 (6.8, 13.5)   | 17 | 8.2 (7.0, 9.7)     |
|                                                                                                                    | 12-23.99 | 99    | 10.2 (7.2, 14.4)               | 90    | 9.6 (7.0, 13.3)   | 54    | 8.1 (6.6, 9.8)    | 63 | 7.6 (6.2, 9.5)     |
|                                                                                                                    | 24-59.99 | 193   | 7.6 (6.1, 9.5)                 | 154   | 7.2 (5.4, 9.6)    | 95    | 6.7 (5.2, 8.6)    | 89 | 6.3 (5.2, 7.5)     |
| * Age 6-11.99 mo : <i>P</i> =0.119; Age12-23.99 mo <i>P</i> <0.001; Setting : <i>P</i> <0.001; Sex <i>P</i> <0.001 |          |       |                                |       |                   |       |                   |    |                    |
| RBP<br>(µmol/L)                                                                                                    | 6-11.99  | 36    | 1.12 (0.87, 1.45) <sup>2</sup> | 40    | 1.06 (0.80, 1.41) | 23    | 1.28 (0.94, 1.76) | 14 | 1.20 (0.89, 1.60)  |
|                                                                                                                    | 12-23.99 | 78    | 1.08 (0.82, 1.42)              | 70    | 1.12 (0.88, 1.42) | 48    | 1.27 (0.96, 1.67) | 56 | 1.30 (1.01, 1.67)  |
|                                                                                                                    | 24-59.99 | 167   | 1.13 (0.86, 1.47)              | 136   | 1.08 (0.84, 1.40) | 89    | 1.27 (1.01, 1.64) | 80 | 1.25 (0.97, 1.67)  |
| * Age 6-11.99 mo : <i>P</i> =0.65; Age12-23.99 mo <i>P</i> =0.47; Setting : <i>P</i> <0.001; Sex <i>P</i> =0.36    |          |       |                                |       |                   |       |                   |    |                    |

<sup>1</sup>Values are arithmetic mean ± SD or geometric mean (-SD, + SD)

\* Significance of differences from regression with age 24-59.99 mo used as the reference age group

<sup>2</sup> Corrected for subclinical inflammation

Hb, hemoglobin; MCV, mean cell volume; RDW, red cell distribution width; MCH, mean cell

hemoglobin; RBC, red blood cell count; sTfr, soluble transferrin receptor; RBP, retinol binding protein
